# Supplementary material for: Multifunctional Lipid-Based Nanoparticles for Codelivery of Anticancer Drugs and siRNA for Treatment of Non-Small Cell Lung Cancer with Different Level of Resistance and EGFR Mutations
Source: MDPI journal article supplement (doi:10.3390/pharmaceutics13071063), 2021-07-11
Supplement: s1 [file s1]

# Supplementary Materials: Multifunctional Lipid-Based Nanoparticles for Codelivery of Anticancer Drugs and siRNA for Treatment of Non-Small Cell Lung Cancer with Different Level of Resistance and EGFR Mutations

Joydeb Majumder and Tamara Minko

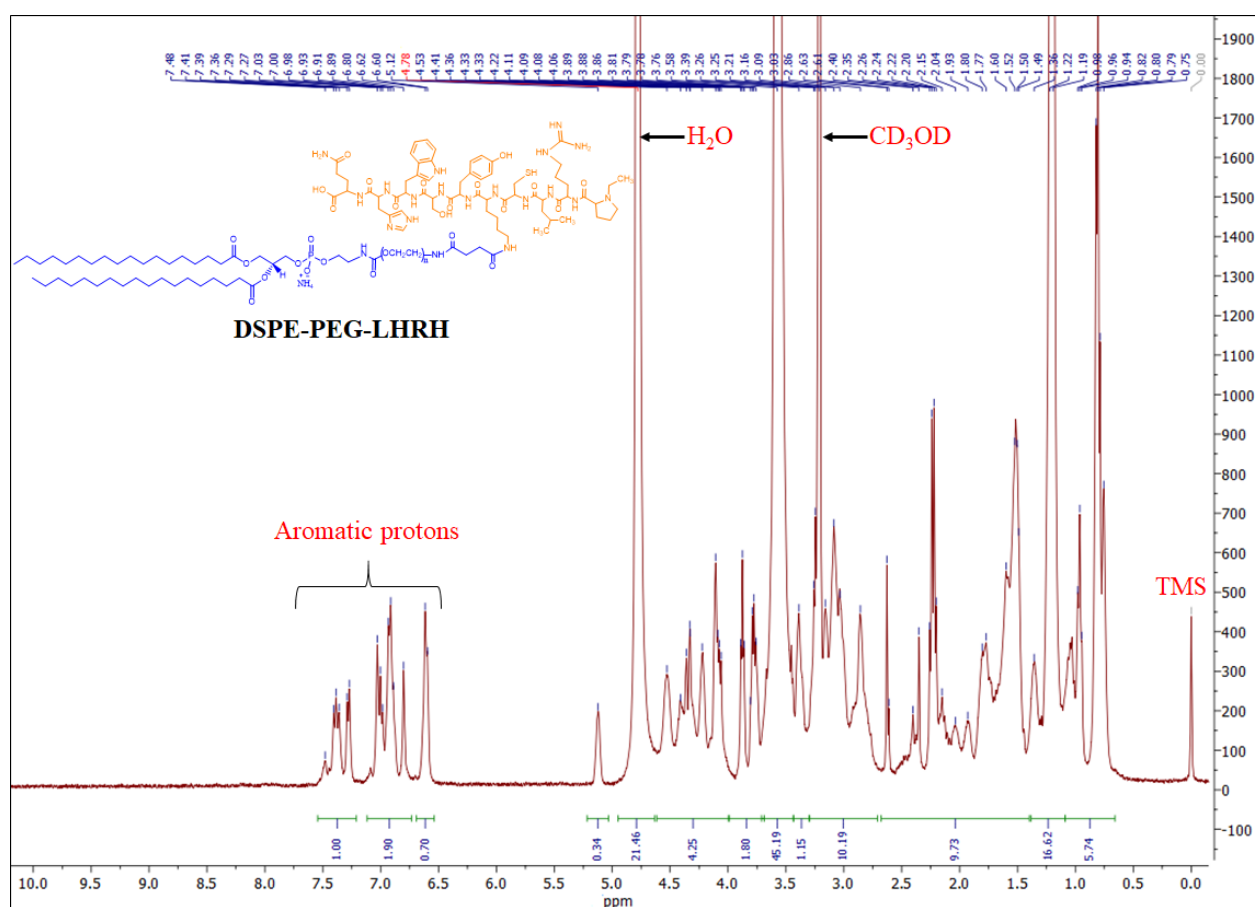

**Figure S1.** <sup>1</sup>H-NMR spectrum of the targeting ligand DSPE-PEG-LHRH peptide using CD<sub>3</sub>OD solvent. 20 mg of DSPE-PEG-LHRH peptide was dissolved in 0.6 ml of deuterated methanol (CD<sub>3</sub>OD). <sup>1</sup>H-NMR data was recorded using 400 MHz Bruker NMR instrument at room temperature. Chemical shifts are shown in ppm. The reference standard tetramethyl silane (TMS) appeared at 0.0 ppm and the aromatic protons appeared at 6.5–7.5 ppm.

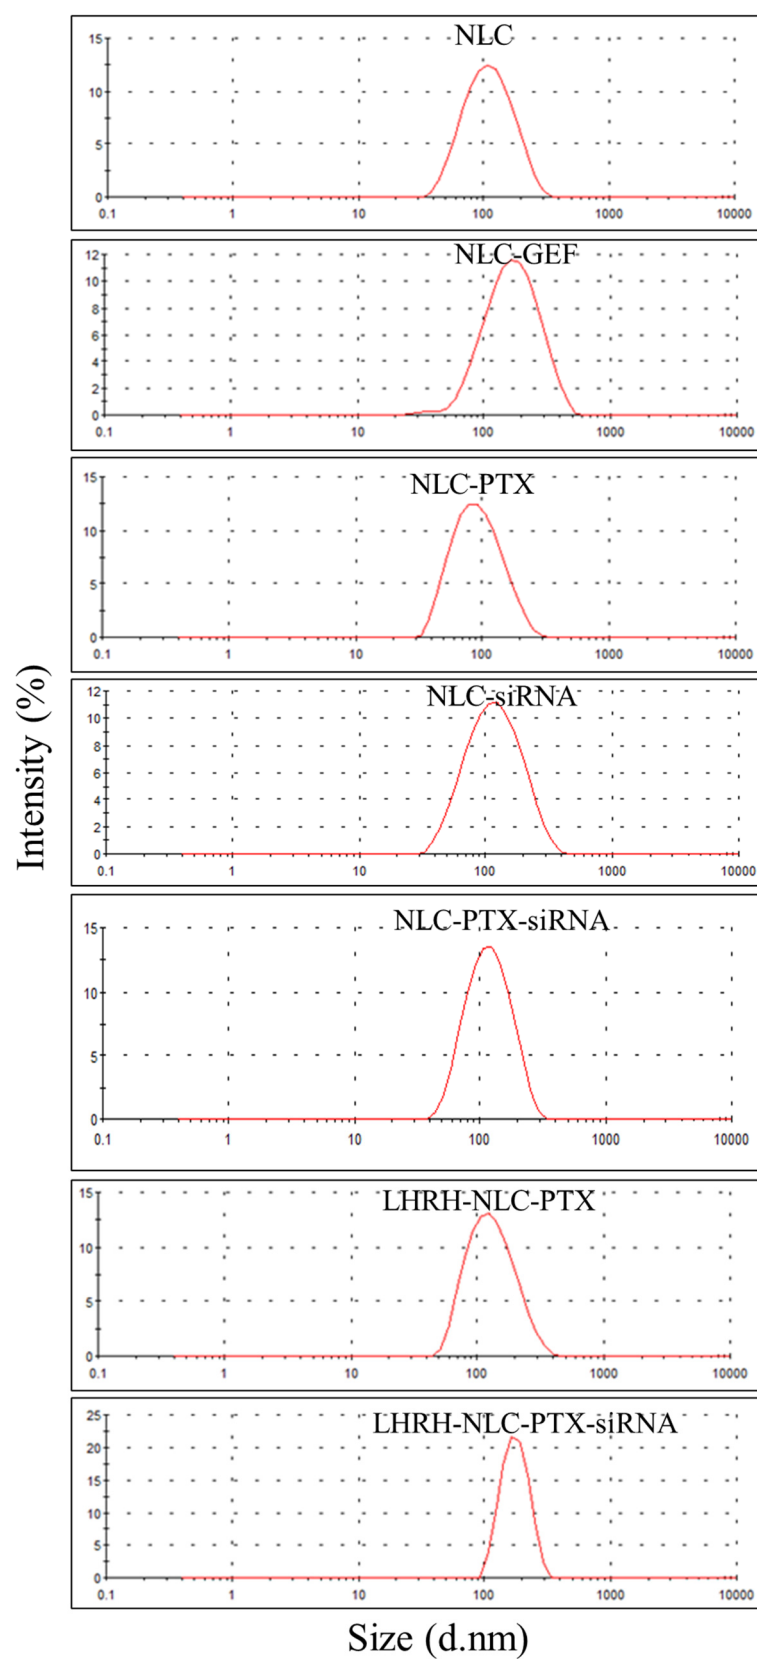

Figure S2. Size distribution profile of the NLC formulations in aqueous phase.

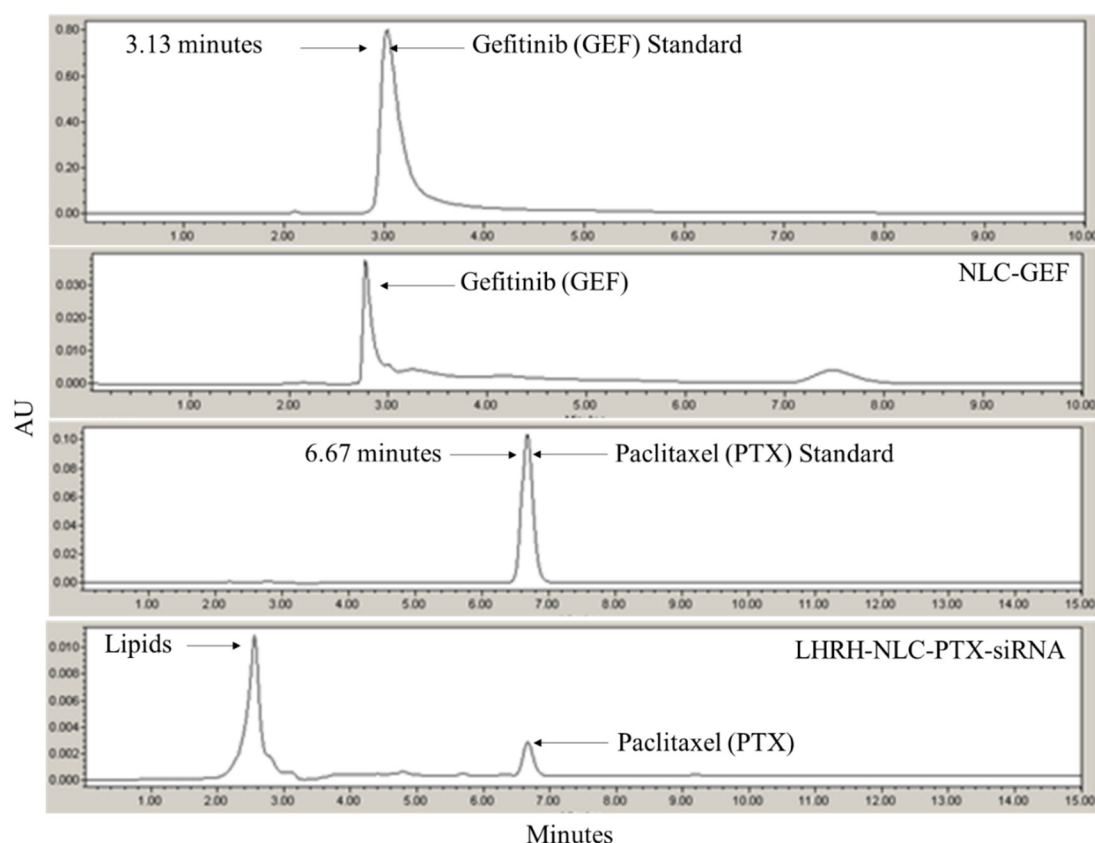

**Figure S3.** HPLC traces (retention time in minutes) of gefitinib (GEF) and paclitaxel (PTX) in standard sample and in the corresponding NLC formulations.

**Table S1.** Stability of the NLC formulations under storage in RPMI-1640 culture media.

| Name of NLC        | Time (Day) | Z-Average Size (nm) | PDI            |
|--------------------|------------|---------------------|----------------|
| NLC                | Day 0      | 106.23 ± 1.07       | 0.242 ± 0.011  |
|                    | Day 7      | 93.44 ± 0.80        | 0.226 ± 0.008  |
|                    | Day 60     | 90.09 ± 1.22        | 0.221 ± 0.004  |
| NLC-GEF            | Day 0      | 149.00 ± 1.03       | 0.216 ± 0.019  |
|                    | Day 7      | 137.96 ± 1.25       | 0.206 ± 0.004  |
|                    | Day 60     | 136.80 ± 0.23       | 0.202 ± 0.005  |
| NLC-PTX            | Day 0      | 82.10 ± 0.52        | 0.157 ± 0.004  |
|                    | Day 7      | 82.78 ± 0.12        | 0.169 ± 0.010  |
|                    | Day 60     | 86.76 ± 1.41        | 0.195 ± 0.004  |
| NLC-siRNA          | Day 0      | 104.10 ± 2.23       | 0.158 ± 0.010  |
|                    | Day 7      | 134.76 ± 4.16       | 0.362 ± 0.001  |
|                    | Day 60     | 122.63 ± 0.57       | 0.270 ± 0.001  |
| NLC-PTX-siRNA      | Day 0      | 101.96 ± 0.51       | 0.158 ± 0.009  |
|                    | Day 7      | 101.90 ± 0.61       | 0.169 ± 0.011  |
|                    | Day 60     | 104.5 ± 0.49        | 0.180 ± 0.010  |
| LHRH-NLC-PTX       | Day 0      | 113.70 ± 0.69       | 0.148 ± 0.012  |
|                    | Day 7      | 113.80 ± 0.69       | 0.150 ± 0.004  |
|                    | Day 60     | 119.30 ± 1.31       | 0.184 ± 0.018  |
| LHRH-NLC-PTX-siRNA | Day 0      | 153.13 ± 1.92       | 0.191 ± 0.008  |
|                    | Day 7      | 161.86 ± 1.69       | 0.181 ± 0.006  |
|                    | Day 60     | 159.26 ± 0.27       | 0.0246 ± 0.005 |
